# Supplementary material
Source: publisher site journal article supplement (https://www.dovepress.com/article/419831)
Supplement: Supplementary file 1 [file get_supplementary_file.php]

**Supplementary Files**

**Legends**

**Supplementary Table 1.** Grouping standard based on the systemic inflammation score (SIS).

**Supplementary Table 2.** Baseline characteristics between non-CA-AKI and CA-AKI group.

**Supplementary Table 3.** Predictive value of SIS for CA-AKI（defined by the ESUR）in various multivariate-adjusted models.

**Supplementary Figure 1.** Forest plot of the subgroup analyses for association between the SIS and CA-AKI.

**Supplementary Table 1.** Grouping standard based on systemic inflammation score (SIS).

| Variables and Cutoff values | Systemic inflammation score | Groups |
| --- | --- | --- |
| Albumin >40 g/L  and LMR >3.63 | 0 | Low SIS |
| Albumin >40 g/L  and LMR ≤3.63 | 1 | High SIS |
| Albumin ≤40 g/L  and LMR >3.63 | 1 |
| Albumin ≤40 g/L  and LMR ≤3.63 | 2 |

**Notes:**

**Abbreviations:** LMR, lymphocyte-to-monocyte ratio.

| **Supplementary Table 2.** Baseline characteristics between non-CA-AKI and CA-AKI group | | | |
| --- | --- | --- | --- |
| Variables | non-CA-AKI, n=5377 | CA-AKI, n*=*349 | *P* value |
| **Demographics** | | | |
| Age, mean ± SD, years | 65.1 ± 10.4 | 68.2 ± 11.3 | <0.001 |
| Gender, female, n (%) | 1129 (21.0) | 99 (28.4) | 0.001 |
| BMI, median (IQR), kg/m2 | 24.22 (22.32-26.30) | 24.17 (22.29-26.05) | 0.242 |
| SBP, mean ± SD, mmHg | 133.07 ± 20.37 | 138.58 ± 21.66 | 0.002 |
| DBP, mean ± SD, mmHg | 75.21 ± 11.64 | 77.41 ± 11.87 | 0.025 |
| **Comorbidities, n (%)** | | | |
| Hypertension | 3619 (67.3) | 263 (75.4) | 0.002 |
| Diabetes | 1888 (35.1) | 150 (43.0) | 0.004 |
| Congestive heart failure | 198 (3.9) | 43 (13.7) | <0.001 |
| Atrial fibrillation | 323 (6.0) | 51 (14.6) | <0.001 |
| Chronic kidney disease | 453 (8.4) | 63 (18.1) | <0.001 |
| Hypotension | 340 (6.32) | 45 (12.9) | <0.001 |
| Acute myocardial infarction | 1646 (30.61) | 209 (59.9) | <0.001 |
| Anemia | 1429 (26.6) | 151 (43.3) | <0.001 |
| **Procedure performed, mean ± SD** | | | |
| CM volume, mL | 196.2 (64.4) | 197.8 (64.0) | 0.651 |
| Number of stents, n | 1.64 (0.87) | 1.65 (0.97) | 0.809 |
| Stent length, mm | 44.44 (26.8) | 45.60 (28.7) | 0.474 |
| **Laboratory measurements, median (IQR)** | | | |
| White blood cell, 109/L | 6.97 (5.81-8.40) | 7.43 (6.01-9.32) | <0.001 |
| Neutrophil, 109/L | 4.29 (3.39-5.49) | 4.96 (3.62-6.69) | <0.001 |
| Lymphocyte, 109/L | 1.84 (1.47-2.31) | 1.68 (1.37-2.12) | <0.001 |
| Monocyte, 109/L | 0.46 (0.36-0.59) | 0.51 (0.38-0.64) | <0.001 |
| Hemoglobin, g/L | 138 (128-148) | 131 (119-144) | <0.001 |
| Platelets, 109/L | 213 (181-254) | 212 (179-248) | 0.495 |
| Albumin, g/L | 41.6 (38.9-44.3) | 39.2 (36.3-42.0) | <0.001 |
| Creatinine, mg/dL | 0.88 (0.76-1.02) | 0.84 (0.70-1.06) | 0.145 |
| HDL-C, mmol/L | 1.00 (0.84-1.19) | 0.97 (0.82-1.15) | 0.027 |
| LDL-C, mmol/L | 2.57 (2.00-3.28) | 2.70 (2.06-3.33) | 0.093 |
| NT-proBNP, pg/mL | 193 (69-709) | 1160 (324-3084) | <0.001 |
| HbA1c, % | 6.00 (6.0-7.0) | 6.00 (6.0-8.0) | 0.003 |
| LVEF, % | 59.0 (56.0-62.0) | 57.0 (48.0-60.0) | <0.001 |
| LMR | 4.06 (2.94-5.39) | 3.33 (2.45-4.87) | <0.001 |
| NLR | 2.29 (1.69-3.21) | 2.79 (2.04-4.01) | <0.001 |
| PLR | 115 (90-148) | 123 (97-167) | <0.001 |
| SII | 490 (347-728) | 609 (420-925) | <0.001 |
| SIRI | 1.06 (0.68-1.68) | 1.44 (0.88-2.28) | <0.001 |
| **Medical therapy during hospitalization, n (%)** | | | |
| Antiplatelet | 5366 (99.8) | 347 (99.4) | 0.186 |
| Statin | 5327 (99.1) | 345 (98.9) | 0.570 |
| ACEI/ARB | 4441 (82.6) | 300 (86.0) | 0.123 |
| β-blocker | 4436 (82.5) | 303 (86.8) | 0.046 |
| CCB | 1881 (35.0) | 131 (37.5) | 0.363 |
| Diuretics | 1238 (23.0) | 214 (61.3) | <0.001 |

**Notes:**

**Abbreviations:** CA-AKI, contrast-associated acute kidney injury; SIS, systemic inflammation score; BMI, body mass index; SBP, systolic blood pressure; DBP, diastolic blood pressure; CM, contrast medium; LDL-C, low density lipoprotein-cholesterol; HDL-C, high density lipoprotein-cholesterol; NT-proBNP, Nterminal pro-brain natriuretic peptide; HbA1c, hemoglobin A1c; LVEF, left ventricular ejection fraction; LMR,lymphocyte-to-monocyte ratio; NLR, neutrophil-to-lymphocyte ratio; PLR, platelet-to-lymphocyte ratio; SII, systemic immune-inflammation index; SIRI, systemic inflammation response index; ACEI/ARB, angiotensin-converting enzyme inhibitor/angiotensin receptor blocker; CCB, calcium channel blockers.

**Supplementary Table 3.** Predictive value of SIS for CA-AKI（defined by the ESUR）in various multivariate-adjusted models

| Models | Low SIS group* | High SIS group | |
| --- | --- | --- | --- |
| OR (95% CI) | OR (95% CI) | *P* value |
| Unadjusted | 1 (Ref.) | 1.45 (1.26-1.66) | <0.001 |
| Model 1 | 1 (Ref.) | 1.55 (1.35-1.78) | <0.001 |
| Model 2 | 1 (Ref.) | 1.54 (1.33-1.78) | <0.001 |
| Model 3 | 1 (Ref.) | 1.26 (1.07-1.47) | 0.005 |

**Notes:** *Reference group.

Model 1: adjusted age >75 years and gender.

Model 2: Model 1 + hypertension, diabetes, congestive heart failure, atrial fibrillation, chronic kidney disease and hypotension.

Model 3: Model 2 + acute myocardial infarction, anemia and contrast medium volume >150 mL.

**Abbreviations:** SIS, systemic inflammation score; CA-AKI, contrast-associated acute kidney injury; OR, odds ratio; CI, confidence interval.

**Supplementary Figure 1.** Forest plot of the subgroup analyses for association between the SIS and CA-AKI.

**
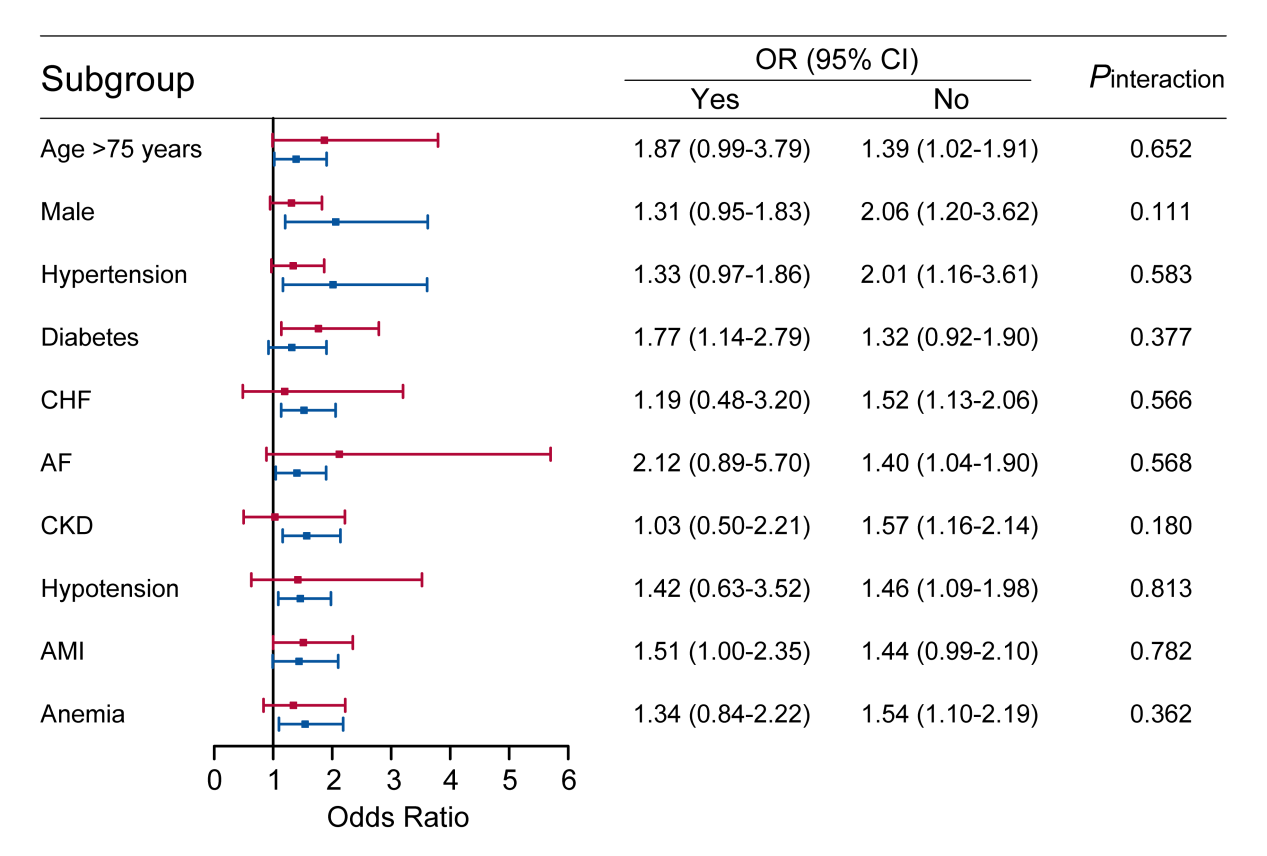
Notes:** “Yes” refers to the red lines, “No” refers to the blue lines.

**Abbreviations:** SIS, systemic inflammation score; CA-AKI, contrast-associated acute kidney injury; CHF, congestive heart failure; AF, atrial fibrillation; CKD, chronic kidney disease; AMI, acute myocardial infarction; OR, odds ratio; CI, confidence interval.
